# Supplementary material
Source: Springer Nature journal article supplement (https://www.springermedizin.de/resource/supplementary/12913_2011_1895_MOESM3_ESM.pdf/9529562)

Identification

Screening

Eligibility

Included

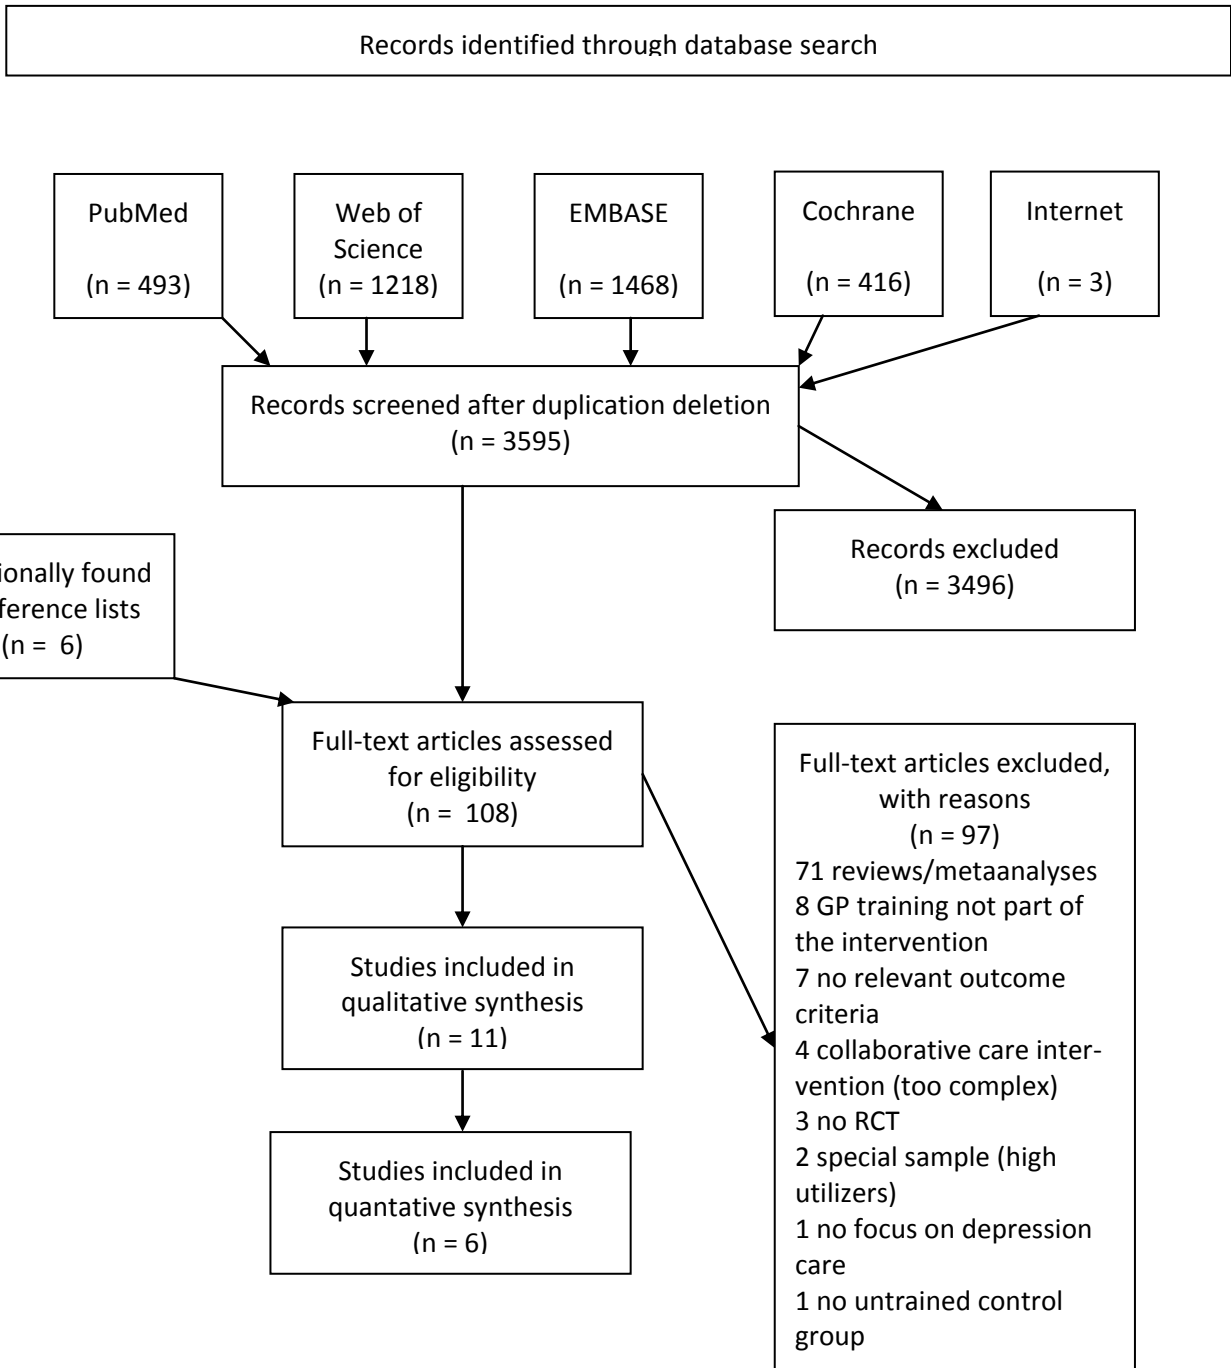

Supplement: MOESM3 [file 9529562]
